# Supplementary material for: Association Between Regular Use of Gastric Acid Suppressants and Subsequent Risk of Cholelithiasis: A Prospective Cohort Study of 0.47 Million Participants
Source: PubMed Central journal article supplement (PMC8831324; doi:10.3389/fphar.2021.813587), 2022-01-28
Supplement: Presentation1.pdf [file Presentation1.pdf]

## ***Supplementary Material***

### **1. Supplementary Figure**

**Figure S1.** Flowchart of participant selection.

### **2. Supplementary Tables**

**Supplementary Table 1** Sensitivity analyses of the association between acid suppressant use and risk of cholelithiasis after lagging the exposure for 4 years.

**Supplementary Table 2** Sensitivity analyses of the association between acid suppressant use and risk of cholelithiasis using propensity score – matching approach in the UK biobank

**Supplementary Table 3** Sensitivity analyses of the association between acid suppressant use and risk of cholelithiasis after further adjustment for *H. pylori* eradication in the UK biobank

**Supplementary Table 4** Sensitivity analyses of the association between acid suppressant use and risk of cholelithiasis by adjusting for genetic confounding.

**Supplementary Table 5** Stratified analyses of the associations between acid suppressant use and risk of cholelithiasis by environmental factors

**Supplementary Table 6** Genetic interaction of regular use of PPIS/H2RAs with cholelithiasis

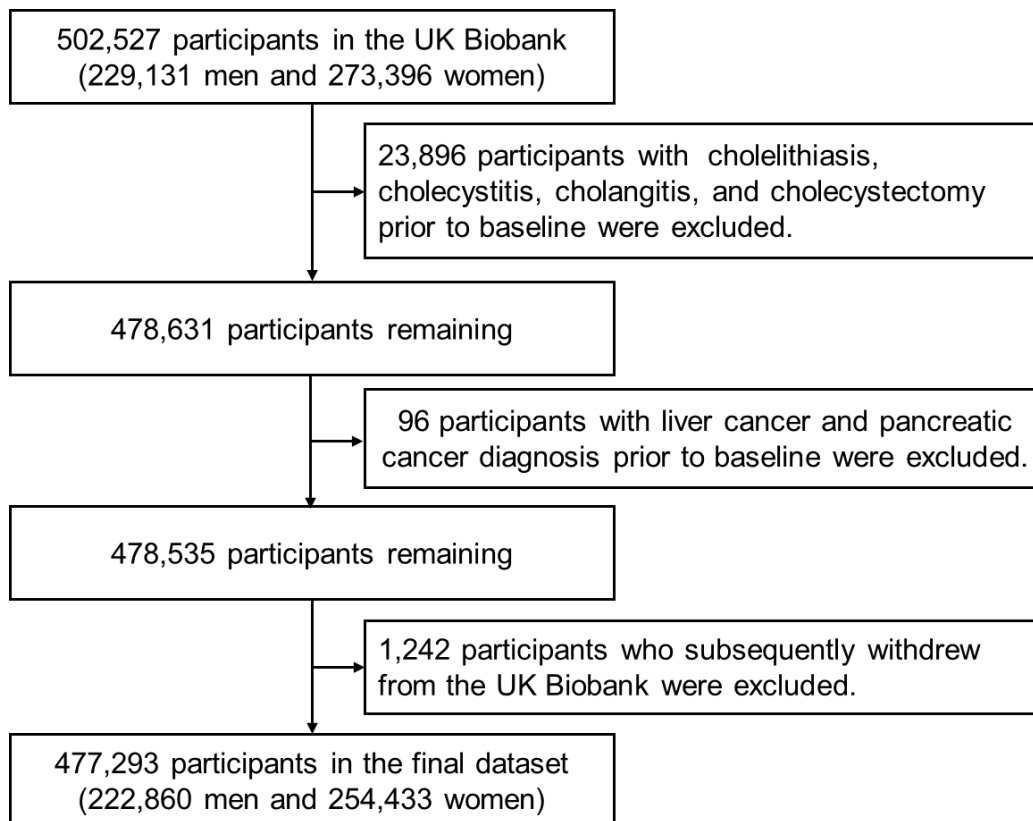

**Figure S1.** Flowchart of participant selection.

**Table S1.** Sensitivity analyses of the association between acid suppressant use and risk of cholelithiasis after lagging the exposure for 4 years.

|                 | <b>Non-regular<br/>PPI user</b> | <b>Regular PPI<br/>user</b> | <b>Non-regular<br/>H2RA user</b> | <b>Regular H2RA<br/>user</b> |
|-----------------|---------------------------------|-----------------------------|----------------------------------|------------------------------|
| Cases           | 8387                            | 1826                        | 9866                             | 347                          |
| Person-years    | 4771884                         | 477647                      | 5147572                          | 101959                       |
| Incidence rate* | 1.76                            | 3.82                        | 1.92                             | 3.40                         |
| HR [95%CI]†     | 1.00 [Ref]                      | 1.23 [1.16 ,1.31]           | 1.00 [Ref]                       | 1.14 [1.02 ,1.27]            |
| RD [95%CI]†     | 1.00 [Ref]                      | 2.76 [2.25, 3.14]           | 1.00 [Ref]                       | 1.87 [0.37, 2.67]            |

\* Per 1000 person years.

† Estimated effects were based on the fully adjusted model.

**Table S2.** Sensitivity analyses of the association between acid suppressant use and risk of cholelithiasis using propensity score–matching approach in the UK biobank.

|                 | <b>Non-regular<br/>PPI user</b> | <b>Regular PPI user</b> | <b>Non-regular<br/>H2RA user</b> | <b>Regular H2RA<br/>user</b> |
|-----------------|---------------------------------|-------------------------|----------------------------------|------------------------------|
| Cases           | 3873                            | 2120                    | 1483                             | 438                          |
| Person-years    | 1121046                         | 442871                  | 373443                           | 107762                       |
| Incidence rate* | 3.46                            | 4.79                    | 3.97                             | 4.07                         |
| HR [95%CI]†     | 1.00 [Ref]                      | 1.37 [1.30 ,1.45]       | 1.00 [Ref]                       | 1.19 [1.07 ,1.33]            |
| RD [95%CI]†     | 1.00 [Ref]                      | 4.12 [3.82, 4.35]       | 1.00 [Ref]                       | 2.64 [1.3, 3.4]              |

\* Per 1000 person years.

† Estimated effects were based on the fully adjusted model.

**Table S3.** Sensitivity analyses of the association between acid suppressant use and risk of cholelithiasis after adjustment for *H. pylori* eradication

|                 | <b>Non-regular<br/>PPI user</b> | <b>Regular PPI user</b> | <b>Non-regular<br/>H2RA user</b> | <b>Regular H2RA<br/>user</b> |
|-----------------|---------------------------------|-------------------------|----------------------------------|------------------------------|
| Cases           | 10506                           | 2364                    | 12420                            | 450                          |
| Person-years    | 4787178                         | 481232                  | 5165809                          | 102600                       |
| Incidence rate* | 2.20                            | 4.91                    | 2.40                             | 4.39                         |
| HR [95%CI]†     | 1.00 [Ref]                      | 1.21[1.15, 1.29]        | 1.00 [Ref]                       | 1.16 [1.05 ,1.28]            |
| RD [95%CI]†     | 1.00 [Ref]                      | 3.30 [2.70, 3.86]       | 1.00 [Ref]                       | 2.55 [1.04, 3.43]            |

\* Per 1000 person years.

† Estimated effects were based on the fully adjusted model.

**Table S4.** Sensitivity analyses of the association between acid suppressant use and risk of cholelithiasis by adjusting for genetic confounding.

|                 | <b>Non-regular<br/>PPI user</b> | <b>Regular PPI user</b> | <b>Non-regular<br/>H2RA user</b> | <b>Regular H2RA<br/>user</b> |
|-----------------|---------------------------------|-------------------------|----------------------------------|------------------------------|
| Cases           | 3873                            | 2120                    | 1483                             | 438                          |
| Person-years    | 1121046                         | 442871                  | 373443                           | 107762                       |
| Incidence rate* | 3.46                            | 4.79                    | 3.97                             | 4.07                         |
| HR [95%CI]†     | 1.00 [Ref]                      | 1.37 [1.30 ,1.45]       | 1.00 [Ref]                       | 1.19 [1.07 ,1.33]            |
| RD [95%CI]†     | 1.00 [Ref]                      | 4.12 [3.82, 4.35]       | 1.00 [Ref]                       | 2.64 [1.3, 3.4]              |

\* Per 1000 person years.

† Estimated effects were based on the fully adjusted model.

**Table S5.** Stratified analyses of the associations between acid suppressant use and risk of cholelithiasis by environmental factors

|                                                        | Regular use of PPI |              |                  |                                    |               | Regular use of H2RA |              |                  |                                    |               |
|--------------------------------------------------------|--------------------|--------------|------------------|------------------------------------|---------------|---------------------|--------------|------------------|------------------------------------|---------------|
|                                                        | Cases              | Person-years | Incidence rate * | Multivariate-adjusted HR (95%CI) † | P interaction | Cases               | Person-years | Incidence rate * | Multivariate-adjusted HR (95%CI) † | P interaction |
| <b>Sex</b>                                             |                    |              |                  |                                    |               |                     |              |                  |                                    |               |
| Male                                                   | 1423               | 251506       | 5.66             | 1.33 [1.22 ,1.45]                  | 0.010         | 274                 | 53575        | 5.11             | 1.22 [1.05 ,1.43]                  | 0.316         |
| Female                                                 | 941                | 229726       | 4.10             | 1.15 [1.07 ,1.23]                  |               | 176                 | 49025        | 3.59             | 1.11 [0.98 ,1.26]                  |               |
| <b>Age</b>                                             |                    |              |                  |                                    |               |                     |              |                  |                                    |               |
| < 60                                                   | 901                | 203105       | 4.44             | 1.14 [1.04 ,1.24]                  | 0.807         | 217                 | 54621        | 3.97             | 1.20 [1.04 ,1.38]                  | 0.249         |
| ≥ 60                                                   | 1463               | 278127       | 5.26             | 1.30 [1.21 ,1.39]                  |               | 233                 | 47979        | 4.86             | 1.12 [0.98 ,1.28]                  |               |
| <b>Obesity</b>                                         |                    |              |                  |                                    |               |                     |              |                  |                                    |               |
| No                                                     | 1193               | 308738       | 3.86             | 1.19 [1.11 ,1.29]                  | 0.38          | 236                 | 67405        | 3.50             | 1.19 [1.04 ,1.36]                  | 0.48          |
| Yes                                                    | 1171               | 172494       | 6.79             | 1.25 [1.15 ,1.35]                  |               | 214                 | 35195        | 6.08             | 1.11 [0.97 ,1.28]                  |               |
| <b>Never smoker</b>                                    |                    |              |                  |                                    |               |                     |              |                  |                                    |               |
| Yes                                                    | 1005               | 227192       | 4.42             | 1.12 [1.03 ,1.21]                  | 0.006         | 198                 | 46755        | 4.24             | 1.17 [1.01 ,1.36]                  | 0.844         |
| No                                                     | 1359               | 254041       | 5.35             | 1.31 [1.22 ,1.42]                  |               | 252                 | 55846        | 4.51             | 1.15 [1.01 ,1.31]                  |               |
| <b>Never drinker</b>                                   |                    |              |                  |                                    |               |                     |              |                  |                                    |               |
| Yes                                                    | 370                | 56627        | 6.53             | 1.23 [1.06 ,1.42]                  | 0.437         | 61                  | 10734        | 5.68             | 1.09 [0.83 ,1.42]                  | 0.502         |
| No                                                     | 1994               | 424606       | 4.70             | 1.22 [1.15 ,1.3]                   |               | 389                 | 91867        | 4.23             | 1.16 [1.05 ,1.29]                  |               |
| <b>Physical activity</b>                               |                    |              |                  |                                    |               |                     |              |                  |                                    |               |
| < median                                               | 1677               | 312131       | 5.37             | 1.27 [1.19 ,1.36]                  | 0.899         | 327                 | 65969        | 4.96             | 1.22 [1.09 ,1.37]                  | 0.301         |
| ≥ median                                               | 687                | 169101       | 4.06             | 1.12 [1.02 ,1.24]                  |               | 123                 | 36632        | 3.36             | 1.03 [0.86 ,1.24]                  |               |
| <b>Below 5 portions of fruit and vegetable per day</b> |                    |              |                  |                                    |               |                     |              |                  |                                    |               |
| Yes                                                    | 1525               | 300038       | 5.08             | 1.23 [1.15 ,1.32]                  | 0.593         | 297                 | 66411        | 4.47             | 1.18 [1.04 ,1.33]                  | 0.709         |
| No                                                     | 839                | 181194       | 0.35             | 1.21 [1.10 ,1.32]                  |               | 153                 | 36190        | 0.35             | 1.13 [0.95 ,1.33]                  |               |

\* Per 1000 person years.

† Estimated effects were based on the fully adjusted model.

**Table S6.** Genetic interaction of regular use of PPIS/H2RAs with cholelithiasis

|                      | Regular use of PPIs |              |                |                                   |                                   | Regular use of H2RAs |              |                |                                   |                                   |
|----------------------|---------------------|--------------|----------------|-----------------------------------|-----------------------------------|----------------------|--------------|----------------|-----------------------------------|-----------------------------------|
|                      | Cases               | Person-years | Incidence rate | Multivariate-adjusted HR [95% CI] | Multivariate-adjusted RD [95% CI] | Cases                | Person-years | Incidence rate | Multivariate-adjusted HR [95% CI] | Multivariate-adjusted RD [95% CI] |
| <b>rs1260326</b>     |                     |              |                |                                   |                                   |                      |              |                |                                   |                                   |
| <i>CC</i>            | 863                 | 171515       | 5.03           | 1.26 [1.15 ,1.38]                 | 3.76 [2.76, 4.36]                 | 174                  | 37451        | 4.65           | 1.23 [1.05 ,1.44]                 | 3.30 [1.09, 4.21]                 |
| <i>CT</i>            | 1048                | 218781       | 4.79           | 1.25 [1.15 ,1.36]                 | 3.53 [2.64, 4.09]                 | 196                  | 46457        | 4.22           | 1.12 [0.97 ,1.30]                 | 2.03 [-0.75, 3.40]                |
| <i>TT</i>            | 340                 | 73008        | 4.66           | 1.36 [1.18 ,1.58]                 | 3.98 [2.89, 4.45]                 | 61                   | 15136        | 4.03           | 1.19 [0.92 ,1.56]                 | 2.62 [-2.23, 3.85]                |
| <i>P interaction</i> |                     |              |                | 0.507                             | 0.709                             |                      |              |                | 0.762                             | 0.626                             |
| <b>rs11887534</b>    |                     |              |                |                                   |                                   |                      |              |                |                                   |                                   |
| <i>CC</i>            | 19                  | 1666         | 11.41          | 1.23 [0.49 ,3.09]                 | 7.33 [-100, 11.4]                 | 3                    | 378          | 7.94           | 0.19 [0.03 ,1.11]                 | -384.62 [-833.33, 3.27]           |
| <i>CG</i>            | 355                 | 52997        | 6.70           | 1.18 [1.02 ,1.36]                 | 3.98 [0.64, 5.59]                 | 88                   | 11960        | 7.36           | 1.40 [1.12 ,1.75]                 | 6.33 [3.28, 7.17]                 |
| <i>GG</i>            | 1890                | 410902       | 4.60           | 1.29 [1.21 ,1.37]                 | 3.63 [3.11, 3.97]                 | 342                  | 87150        | 3.92           | 1.13 [1.01 ,1.26]                 | 2.01 [0.21, 2.99]                 |
| <i>P interaction</i> |                     |              |                | 0.517                             | 0.955                             |                      |              |                | 0.502                             | <0.001                            |
| <b>rs4245791</b>     |                     |              |                |                                   |                                   |                      |              |                |                                   |                                   |
| <i>TT</i>            | 1142                | 213033       | 5.36           | 1.27 [1.17 ,1.37]                 | 4.05 [3.16, 4.59]                 | 227                  | 46226        | 4.91           | 1.18 [1.03 ,1.35]                 | 3.02 [0.72, 4.15]                 |
| <i>TC</i>            | 909                 | 202078       | 4.50           | 1.26 [1.15 ,1.37]                 | 3.39 [2.50, 3.89]                 | 171                  | 42690        | 4.01           | 1.16 [0.99 ,1.36]                 | 2.35 [-0.23, 3.46]                |
| <i>CC</i>            | 206                 | 49632        | 4.15           | 1.28 [1.05 ,1.56]                 | 3.26 [1.00, 3.96]                 | 34                   | 10412        | 3.27           | 1.00 [0.70 ,1.44]                 | NA                                |
| <i>P interaction</i> |                     |              |                | 0.272                             | 0.367                             |                      |              |                | 0.946                             | 0.602                             |
| <b>rs9843304</b>     |                     |              |                |                                   |                                   |                      |              |                |                                   |                                   |
| <i>TT</i>            | 645                 | 139409       | 4.63           | 1.23 [1.11 ,1.37]                 | 3.28 [2.07, 3.99]                 | 120                  | 30164        | 3.98           | 1.11 [0.92 ,1.34]                 | 1.81 [-2.21, 3.37]                |
| <i>TC</i>            | 1102                | 227202       | 4.85           | 1.28 [1.18 ,1.39]                 | 3.76 [2.99, 4.24]                 | 214                  | 48000        | 4.46           | 1.19 [1.03 ,1.37]                 | 2.86 [0.67, 3.86]                 |
| <i>CC</i>            | 517                 | 98954        | 5.23           | 1.29 [1.15 ,1.46]                 | 4.09 [2.85, 4.76]                 | 99                   | 21323        | 4.64           | 1.23 [0.99 ,1.51]                 | 3.29 [-0.26, 4.34]                |
| <i>P interaction</i> |                     |              |                | 0.627                             | 0.497                             |                      |              |                | 0.743                             | 0.718                             |
| <b>rs6471717</b>     |                     |              |                |                                   |                                   |                      |              |                |                                   |                                   |
| <i>AA</i>            | 977                 | 204917       | 4.77           | 1.33 [1.22 ,1.46]                 | 3.95 [3.30, 4.36]                 | 169                  | 43980        | 3.84           | 1.08 [0.92 ,1.26]                 | 1.38 [-2.15, 2.94]                |
| <i>AG</i>            | 995                 | 207356       | 4.80           | 1.20 [1.10 ,1.31]                 | 3.15 [1.99, 3.88]                 | 202                  | 43655        | 4.63           | 1.28 [1.10 ,1.47]                 | 3.60[1.92, 4.26]                  |

|                      |      |        |      |                   |                     |     |       |      |                   |                    |
|----------------------|------|--------|------|-------------------|---------------------|-----|-------|------|-------------------|--------------------|
| <i>GG</i>            | 292  | 53292  | 5.48 | 1.34 [1.14 ,1.57] | 4.55 [2.84, 5.20]   | 62  | 11852 | 5.23 | 1.16 [0.88 ,1.53] | 2.97 [-4.60, 4.91] |
| <i>P interaction</i> |      |        |      | 0.267             | 0.166               |     |       |      | 0.400             | 0.298              |
| <b>rs2547231</b>     |      |        |      |                   |                     |     |       |      |                   |                    |
| <i>AA</i>            | 1641 | 325376 | 5.04 | 1.25 [1.17 ,1.34] | 3.70 [2.99, 4.21]   | 314 | 69639 | 4.51 | 1.17 [1.04 ,1.31] | 2.71 [0.88, 3.66]  |
| <i>AC</i>            | 579  | 127553 | 4.54 | 1.33 [1.19 ,1.49] | 3.77 [2.91, 4.22]   | 107 | 27270 | 3.92 | 1.15 [0.94 ,1.40] | 2.21 [-1.55, 3.50] |
| <i>CC</i>            | 44   | 12637  | 3.48 | 1.03 [0.67 ,1.58] | 0.54 [-19.05, 3.35] | 12  | 2579  | 4.65 | 1.59 [0.83 ,3.05] | 4.46 [-6.94, 4.65] |
| <i>P interaction</i> |      |        |      | 0.978             | 0.846               |     |       |      | 0.668             | 0.780              |

\* Per 1000 person years.

† Estimated effects were based on the fully adjusted model.
